# Supplementary material for: Emotion Recognition Abilities in Adults with Anorexia Nervosa are Associated with Autistic Traits
Source: MDPI journal article supplement (doi:10.3390/jcm9041057), 2020-04-08
Supplement: s1 [file s1]

**Table S1.** Target emotions in the films expression task.

|         |              |
|---------|--------------|
| Basic   | Happy        |
|         | Angry        |
|         | Sad          |
|         | Afraid       |
|         | Surprised    |
|         | Disgusted    |
| Complex | Accusing     |
|         | Affectionate |
|         | Amused       |
|         | Confident    |
|         | Defiant      |
|         | Despairing   |
|         | Disappointed |
|         | Disbelieving |
|         | Eager        |
|         | Furious      |
|         | Hostile      |
|         | Hurt         |
|         | Intimidating |
|         | Joking       |
|         | Mocking      |
|         | Pleading     |
|         | Pleased      |
|         | Resentful    |
|         | Satisfied    |
|         | Shocked      |
|         | Suspicious   |
|         | Thoughtful   |
|         | Uneasy       |

**Table S2. Correlations between FET accuracy, time spent looking at faces, and clinical and demographic variables in the full sample.**

|                  | FET<br>accuracy | FET<br>duration | Age <sup>†</sup> | IQ           | BMI          | EDE-Q       | HADS-<br>A  | HADS-<br>D  | LSAS        | TAS-20      | SRS-2       | ADOS-2 |
|------------------|-----------------|-----------------|------------------|--------------|--------------|-------------|-------------|-------------|-------------|-------------|-------------|--------|
| FET<br>accuracy  | -               |                 |                  |              |              |             |             |             |             |             |             |        |
| FET<br>duration  | <b>0.17</b>     | -               |                  |              |              |             |             |             |             |             |             |        |
| Age <sup>†</sup> | 0.03            | 0.03            | -                |              |              |             |             |             |             |             |             |        |
| IQ               | <b>0.23</b>     | -0.03           | 0.15             | -            |              |             |             |             |             |             |             |        |
| BMI              | 0.15            | 0.01            | -0.09            | 0.11         | -            |             |             |             |             |             |             |        |
| EDE-Q            | -0.08           | 0.01            | 0.09             | -0.20        | <b>-0.51</b> | -           |             |             |             |             |             |        |
| HADS-A           | -0.15           | <b>0.21</b>     | 0.03             | -0.22        | <b>-0.47</b> | <b>0.74</b> | -           |             |             |             |             |        |
| HADS-D           | -0.16           | 0.09            | -0.01            | -0.15        | <b>-0.55</b> | <b>0.75</b> | <b>0.77</b> | -           |             |             |             |        |
| LSAS             | -0.06           | <b>0.21</b>     | -0.11            | <b>-0.24</b> | <b>-0.34</b> | <b>0.67</b> | <b>0.69</b> | <b>0.70</b> | -           |             |             |        |
| TAS-20           | <b>-0.18</b>    | 0.07            | <b>-0.19</b>     | <b>-0.23</b> | <b>-0.45</b> | <b>0.63</b> | <b>0.67</b> | <b>0.70</b> | <b>0.69</b> | -           |             |        |
| SRS-2            | -0.15           | 0.13            | -0.17            | <b>-0.29</b> | <b>-0.38</b> | <b>0.62</b> | <b>0.70</b> | <b>0.73</b> | <b>0.75</b> | <b>0.76</b> | -           |        |
| ADOS-2           | <b>-0.17</b>    | 0.10            | <b>-0.17</b>     | -0.06        | <b>-0.19</b> | <b>0.26</b> | <b>0.23</b> | <b>0.24</b> | <b>0.24</b> | <b>0.34</b> | <b>0.28</b> | -      |

ADOS-2: autism diagnostic observation schedule–2nd edition; BMI: body mass index; EDE-Q: eating disorder examination questionnaire; FET accuracy: proportion correct on the films expression task; FET duration: proportion of time spent looking at faces; HADS-A: hospital anxiety and depression scale, anxiety subscale; HADS-D: hospital anxiety and depression scale, depression subscale; IQ: intelligence quotient; LSAS: Liebowitz social anxiety scale; SRS-2: social responsiveness scale–2nd edition; TAS-20: twenty-item Toronto alexithymia scale. Significant correlations ( $p < 0.05$ ) are in bold. <sup>†</sup> Variable was log transformed for analyses.
